# Supplementary material
Source: HighWire-hosted journal article supplement (https://erj.ersjournals.com/content/56/4/2003174)
Supplement: inline-supplementary-material-1 [file inline-supplementary-material-1.pdf]

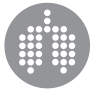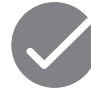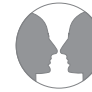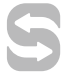

SHAREABLE PDF

# Correlation and causality: a COVID-19 conundrum

Alyn H. Morice

**Affiliation:** Hull York Medical School, University of Hull, Hull, UK.

**Correspondence:** Alyn H. Morice, Castle Hill Hospital, Cottingham, HU16 5JQ, UK. E-mail: a.h.morice@hull.ac.uk

@ERSpublications

**Predictive models depend heavily on the assumptions made in their construction** <https://bit.ly/2Eex05F>

**Cite this article as:** Morice AH. Correlation and causality: a COVID-19 conundrum. *Eur Respir J* 2020; 56:

Copyright ©ERS 2020.. This version is distributed under the terms of the Creative Commons Attribution Non-Commercial Licence 4.0.

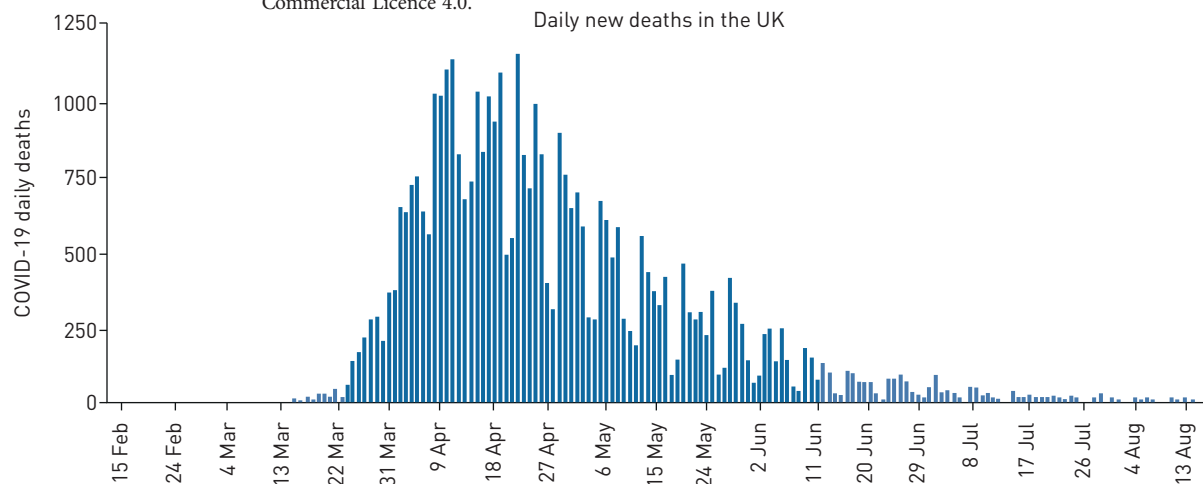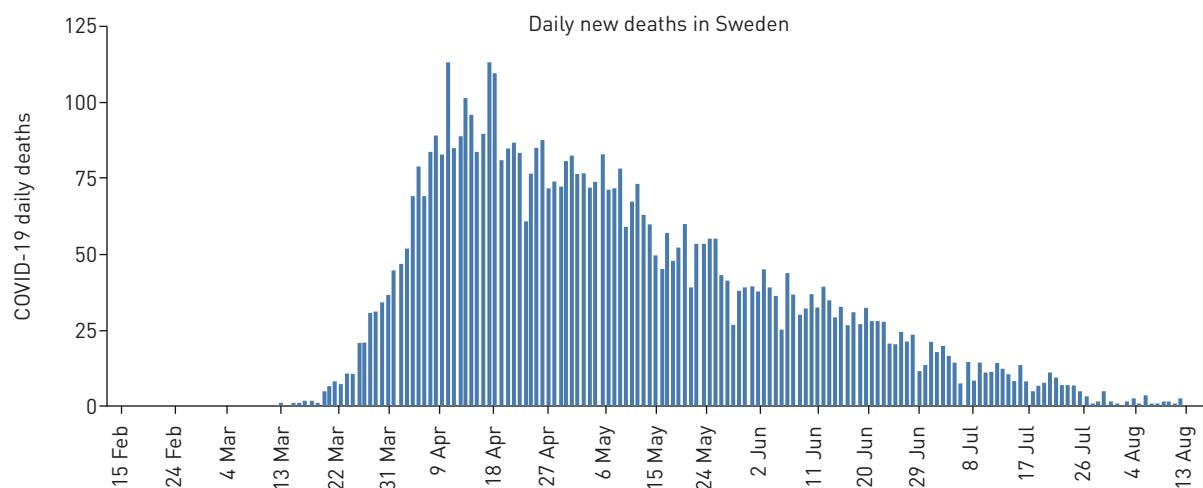

2003174 [<https://doi.org/10.1183/13993003.03174-2020>].

This single-page version can be shared freely online.

*To the Editor:*

I read with interest the two contributions by J.D. Chalmers and co-workers to the July issue of the *European Respiratory Journal*. In a reply to correspondence concerning the inhaled corticosteroid withdrawal controversy in COPD [1], they suggest that A. Agusti succumbs to the fallacy of *post hoc, ergo, propter hoc* [2], *i.e.* A occurred, then B occurred: therefore, A caused B. However, as we know, correlation is not causality.
